# Supplementary material
Source: PubMed Central journal article supplement (PMC5987931)
Supplement: JCB702668_supplementary_material.pdf [file JCB702668_supplementary_material.pdf]

SUPPLEMENTARY MATERIAL

Figure S1

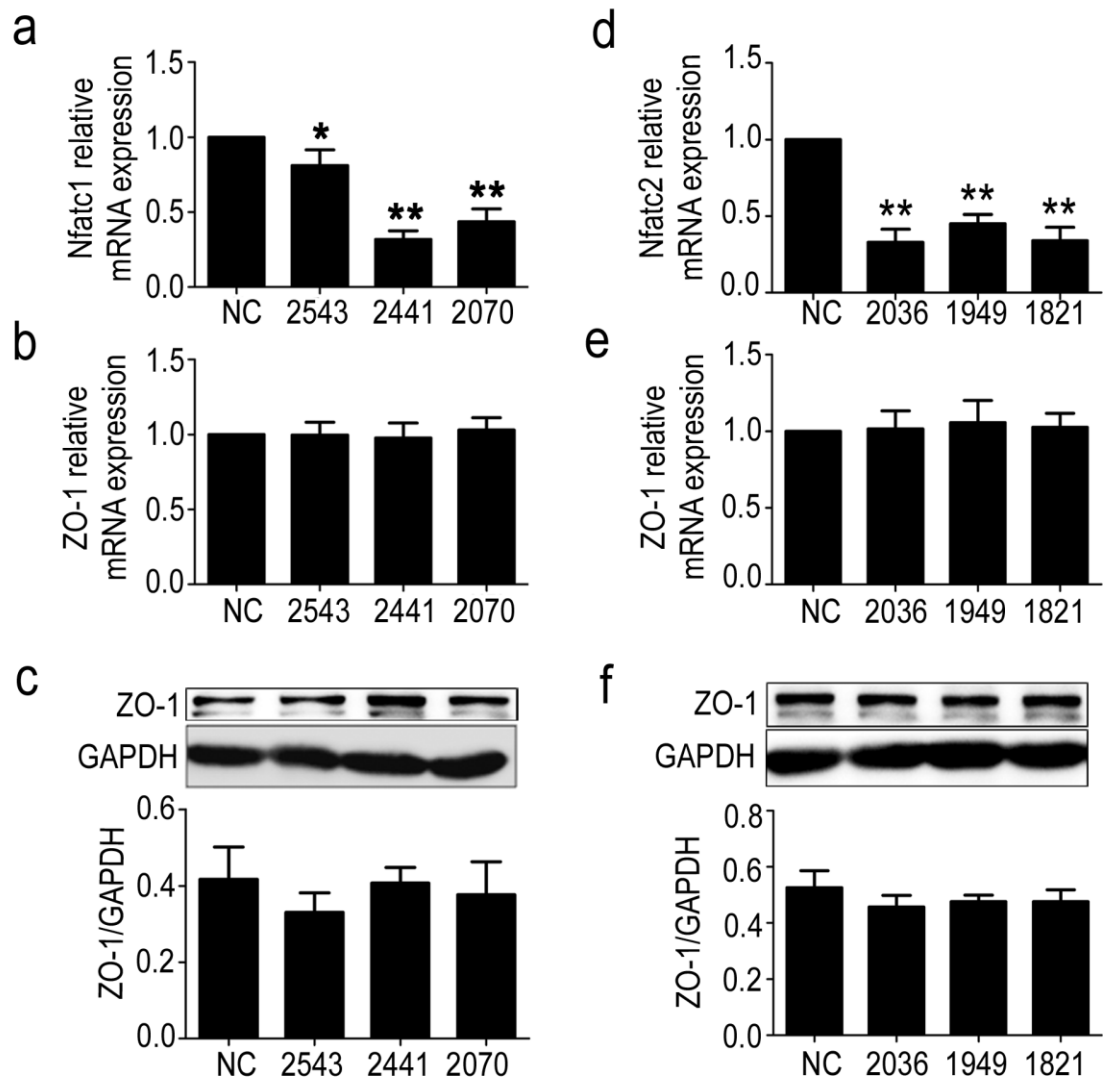

**Figure S1. Effect of NFATC1 and NFATC2 interference on zonula occludens-1 (ZO-1)**

**expression.** (a) NFATC1 interference assay. siNfatc1-2543, SiNfatc1-2441 and siNfatc1-2070 reduced Nfatc1 mRNA levels, (b) whereas did not influence levels of ZO-1 mRNA or (c) protein. (d) NFATC2 interference assay. siNfatc2-2036, siNfatc2-1949, and siNfatc2-1821 suppressed Nfatc2 mRNA expression, (e) whereas did not influence levels of ZO-1 mRNA or (f) protein. One-way ANOVA was used for repeated measurements.

Data are shown as the mean  $\pm$  SD, n = 3.\* p < 0.05 and \*\* p < 0.01 vs. NC.

## Figure S2

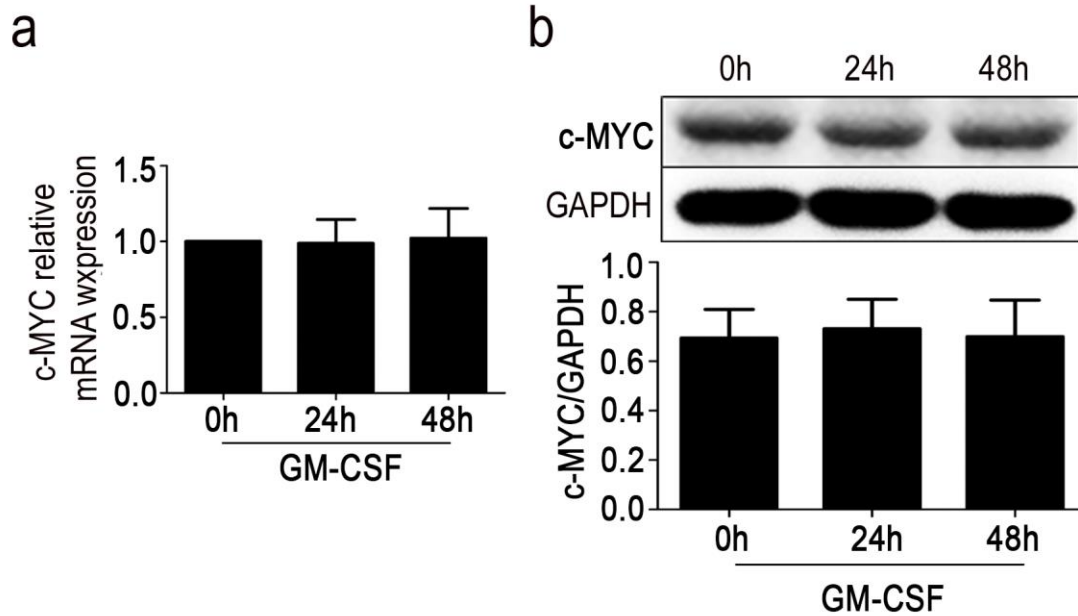

**Figure S2. Effect of granulocyte/macrophage colony-stimulating factor (GM-CSF) on c-MYC expression.** Levels of c-MYC mRNA (a) and protein (b) were detected in human brain microvascular endothelial cells (HBMECs) stimulated with 20 ng/ml GM-CSF for 24 or 48 h. One-way ANOVA was used for repeated measurements. Data are shown as the mean  $\pm$  SD, n = 3.

## Figure S3

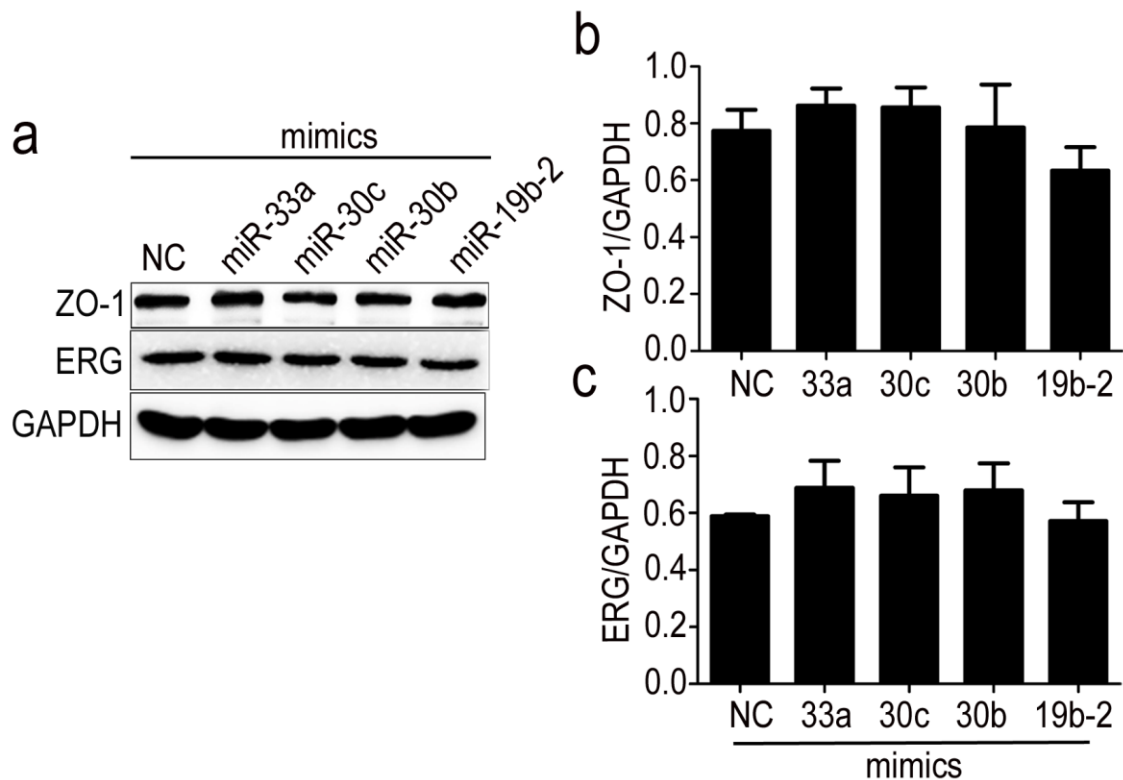

**Figure S3. Effects of miR-33a, miR-30c, miR-30b and miR-19b2 on the erythroblast transformation-specific (ETS) transcription factor ERG and zonula occludens-1 (ZO-1) expression.** Levels of ZO-1 (a, b) and ERG (a, c) protein were not suppressed by miR-33a, miR-30c, miR-30b or miR-19b2 in human brain microvascular endothelial cells (HBMECs). A two-tailed t-test ( $\alpha = 0.05$ ) was used for repeated measurements. Data are shown as the mean  $\pm$  SD,  $n = 3$ .

## Figure S4

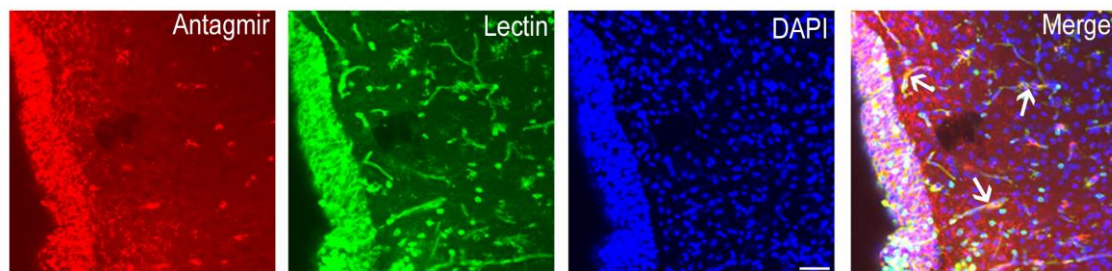

**Figure S4. Diffusion of miR-96 antagomir-cy3 in the mouse brain corpus striatum 48 h after an intracerebroventricular injection.** Vibratome slices (50  $\mu\text{m}$  thick) of corpus striatum were stained with lectin (green) and 4,6-diamidino-2-phenyl-indole (DAPI) (blue). Diffusion of miR-96 antagomir-cy3 into brain microvessels was indicated by white arrows. Scale bar = 100  $\mu\text{m}$ .

**Table S1. siRNA sequences**

| Target gene  | siRNA name     | 5'–3' siRNA sequence   |
|--------------|----------------|------------------------|
| Human ERG    | 605-sense      | GAACAUCGAUGGGAAGGAATT  |
|              | 605-antisense  | UCCUUCUCCAUUGAUGUUCTT  |
|              | 518-sense      | GCUAUGGAGUACAGACCAUTT  |
|              | 518-antisense  | AUGGUCUGUACUCCAUAAGCTT |
|              | 165-sense      | GACCAGUCGUUGUUUGAGUTT  |
|              | 165-antisense  | ACUCAACAACGACUGGUUCTT  |
| Human NFATC1 | 2543-sense     | GGUAACGCCAUCUUCUAATT   |
|              | 2543-antisense | UUAGAAAGAUGGCGUACCTT   |
|              | 2441-sense     | CGGAAUCAGAGGAUAACCATT  |
|              | 2441-antisense | UGGUUAUCCUCUGAUUCCGTT  |
|              | 2070-sense     | GAAACUCCGACAUUGAACUTT  |
|              | 2070-antisense | AGUUCAAUGUCGGAGUUUCTT  |
| Human NFATC2 | 2036-sense     | GUCCAAAGUUGUGUUUACUTT  |
|              | 2036-antisense | AGUAAACACAACUUUGGACTT  |
|              | 1949-sense     | GCCCAUGGUUGAAAGACAATT  |
|              | 1949-antisense | UUGUCUUUCAACCAUGGGCTT  |
|              | 1812-sense     | GAGACGGACAUUGGAAGAATT  |
|              | 1812-antisense | UUCUUCCAAUGUCCGUCUCTT  |
|              | 1475-sense     | UCUCCACACAUCAGCACAATT  |
|              | 1475-antisense | UUGUGCUGAUGUGUGGAGATT  |

|                  |                |                       |
|------------------|----------------|-----------------------|
| Human c-MYC      | 1094-sense     | GCUUGUACCUGCAGGAUCUTT |
|                  | 1094-antisense | AGAUCCUGCAGGUACAAGCTT |
|                  | 587-sense      | GCUUCACCAACAGGAACUATT |
|                  | 587-antisense  | UAGUUCCUGUUGGUGAAGCTT |
| Negative control | Sense          | UUCUCCGAACGUGUCACGUTT |
|                  | antisense      | ACGUGACACGUUCGGAGAATT |

---

**Table S2. Primers of real-time RT-PCR**

| Target | Oligonucleotide sequence | 5'–3'     | Nucleotide | GenBank        |
|--------|--------------------------|-----------|------------|----------------|
| gene   | forward, reverse         | position  |            | accession      |
| ZO-1   | TCAAAGGGAAAGCCTCCTGA     | 4673–4692 |            | NM_001330239.1 |
|        | ATACTGCGAGGGCAATGGAG     | 4780–4761 |            |                |
| ERG    | CGCCGACATCCTTCTCTCAC     | 676–695   |            | NM_001331025.1 |
|        | CCGTGGAGAGTTTTGTAAGGCT   | 775–754   |            |                |
| c-MYC  | GCGAACACACAACGTCTTGG     | 1638–1657 |            | NM_002467.4    |
|        | ACTACCTTGGGGGCCTTTTC     | 1751–1732 |            |                |
| NFATC1 | GTGGTTGAGATCCCGCCATT     | 2048–2067 |            | NM_001278675.1 |
|        | GTGAAACGCTGGTACTGGCT     | 2154–2135 |            |                |
| NFATC2 | GGTCAGTCAAGGTCAGAGGC     | 2250–2269 |            | NM_001258297.1 |
|        | CTTTGGCTCGTGGCATTCTG     | 2324–2305 |            |                |
| GAPDH  | AGGCTGGGGCTCATTTGCAG     | 542–561   |            | NM_001256799.2 |
|        | TGGTGGTGCAGGAGGCATTG     | 685–666   |            |                |

**Table S3. Primers for CHIP and re-CHIP**

| Name   | Target | Oligonucleotide sequence | 5'–3'               | PCR      |
|--------|--------|--------------------------|---------------------|----------|
|        | gene   | forward, reverse         | Nucleotide position | products |
| ChIP   | ZO-1   | GCAGCTCTGGCGGACAT        | -2804– –2787        |          |
|        |        | CTCGCTCTCGGGAGATGTTTA    | -2701– –2681        | 124bp    |
| Re-ChI | ZO-1   | GCCTAGAACTAGGTGTGGTGTC   | -107– –86           |          |
| P      |        | CTAGCATTAAATTACACATTGGGC | 0 – +22             | 130bp    |
